# Supplementary material for: TiO2-Coated Meltblown Nonwoven Fabrics Prepared via Atomic Layer Deposition for the Inactivation of E. coli as a Model Photocatalytic Drinking Water Treatment System
Source: MDPI journal article supplement (doi:10.3390/environments11050092), 2024-04-30
Supplement: s1 [file s1]

## **Supporting Information**

### **TiO<sub>2</sub> coated meltblown nonwoven fabrics prepared via Atomic Layer**

### **Deposition for photocatalytic water treatment**

Alexander G. Aragon<sup>†§</sup>, Jaime A. Cardenas Sanchez<sup>‡§</sup>, Carlos Zimeri<sup>¶</sup>, Eunkyong Shim<sup>¶</sup>, Xiaomeng Fang<sup>¶</sup>, and Kyana R. L. Young<sup>§\*</sup>

<sup>†</sup>Department of Chemistry, Wake Forest University, 1834 Wake Forest Road, Winston-Salem, NC, 27109, USA.

<sup>‡</sup>Department of Biology, Wake Forest University, 1834 Wake Forest Road, Winston-Salem, NC, 27109, USA.

<sup>§</sup>Department of Engineering, Wake Forest University, 455 Vine Street, Winston-Salem, NC, 27101, USA.

<sup>¶</sup>Department of Textile Engineering, North Carolina State University, 1020 Main Campus Drive, Raleigh NC, 27606, USA.

\*Email: [youngk@wfu.edu](mailto:youngk@wfu.edu) (Kyana R.L. Young)

**Characterization of meltblown nonwoven fabric properties:**

The basis weight of the fabric samples used in this study was measured according to the ASTM D3776 Standard Test Methods for Mass Per Unit Area (Weight) of Fabric. The weight of 5 sample replicates, each with a 100 cm<sup>2</sup> area, was measured for each sample. The thickness was measured according to the ASTM D1777 Standard Test Method for Thickness of Textile Materials by an automated thickness gauge (Hanatek Instruments). Ten replicates were tested for each sample used in this experiment.

The fabric solidity (fiber volume fraction),  $S_f$ , was used to evaluate the structure compactness of the samples with porous structure. It was calculated according to the following Equation (S1):

$$S_f = \frac{m}{H \cdot \rho} \times 100(\%) \quad (S1)$$

where  $m$  is the sample weight,  $H$  is the sample thickness, and  $\rho$  is the density of PP (0.91 g/cm<sup>3</sup>).

A Capillary flow porometer (CFP-1100-Ax, Porous Materials Inc., U.S.) was used to measure the mean flow pore diameter and pore diameter distribution. Three replicates of each sample with a measurement area of 5.1 cm<sup>2</sup> were carried out. Galwick solution with a surface tension of 15.9 dynes/cm and tortuosity factor of 0.715 was used.

The fiber diameters of meltblown nonwoven fabrics were measured based on scanning electronic microscope (SEM) images. Meltblown fabrics were sputter-coated with a thin layer of gold/palladium and 10 images per each meltblown samples were taken with an SEM microscope (Phenom FEI) and a total of ~100 fiber diameter measurements per sample were conducted using Image J software from the images.

Table S1. Processing conditions of meltblown nonwoven fabrics production.

| Sample ID | Processing Air volume (m <sup>3</sup> /hr) | Throughput (g/hole/min) | DCD (Die to collector distance) (mm) |
|-----------|--------------------------------------------|-------------------------|--------------------------------------|
| PPW-7     | 500                                        | 0.9                     | 300                                  |
| PPW-8     | 1200                                       | 0.9                     | 300                                  |
| PPW-9     | 1900                                       | 0.9                     | 300                                  |

Table S2. Meltblown fabrics structural characteristics. Average and standard deviations of basis weight, thickness, solidity, pore size and fiber diameters are given.

| Sample ID | Basis Weight (gsm) | Thickness (μm) | Solidity (%) | Pore size                   |                              |                                                  | Fiber Diameter (μm) |
|-----------|--------------------|----------------|--------------|-----------------------------|------------------------------|--------------------------------------------------|---------------------|
|           |                    |                |              | Smallest pore diameter (μm) | Mean flow pore diameter (μm) | Bubble points pore diameter (largest pores) (μm) |                     |
| PPW-7     | 51.40± 1.95        | 895.4 ± 18.9   | 6.31± 0.22   | N/A*                        | N/A*                         | N/A*                                             | 8.74 ± 3.02         |
| PPW-8     | 54.80 ± 1.79       | 495.4 ± 21.8   | 12.16 ± 0.80 | 8.02±0.82                   | 18.96 ± 1.38                 | 47.85 ± 1.53                                     | 3.62 ± 1.15         |
| PPW-9     | 54.00 ± 3.54       | 523.6 ± 17.7   | 11.33 ± 0.66 | 6.60±0.33                   | 15.53 ± 0.14                 | 34.53 ± 0.90                                     | 2.52 ± 0.57         |

\*Note: Pore size of PPW-7 fabric are too big to measure with PMI.

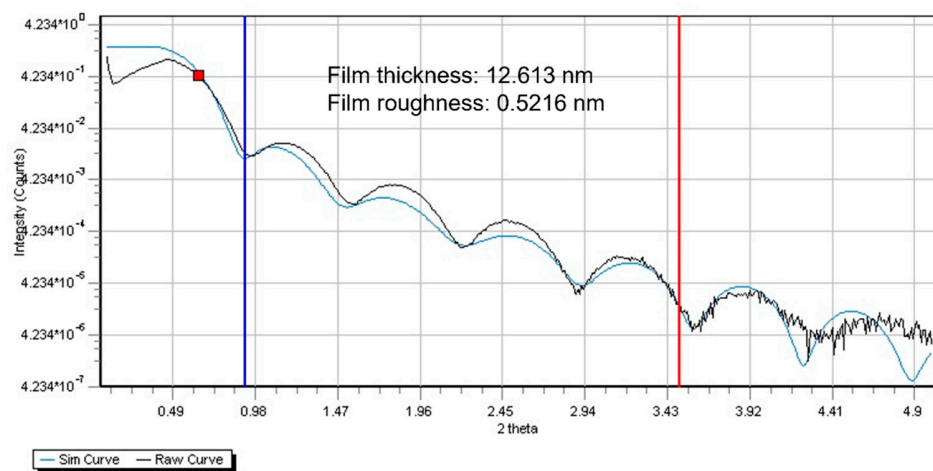

Figure S1: Fitted XRR data for metal oxide ALD film on Si reference.

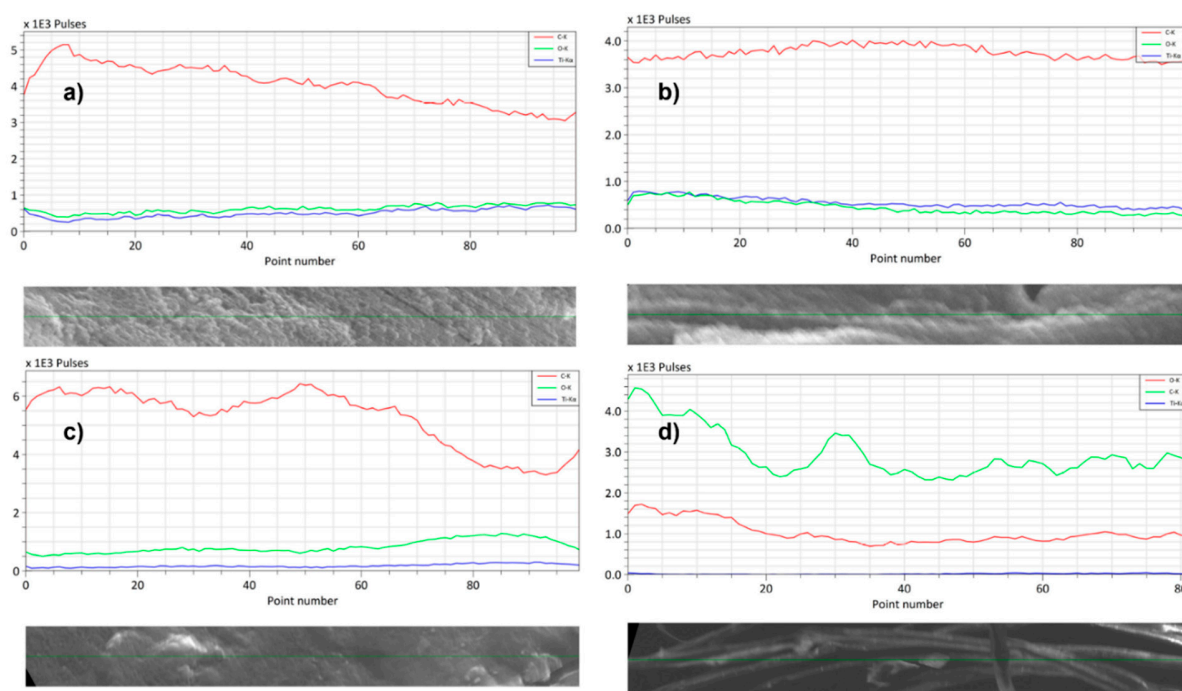

Figure S2: EDS line scan data of  $\text{TiO}_2$  coated fabrics. (a) PPW7 (b) PPW8 (c) PPW9 (d) Lapro.

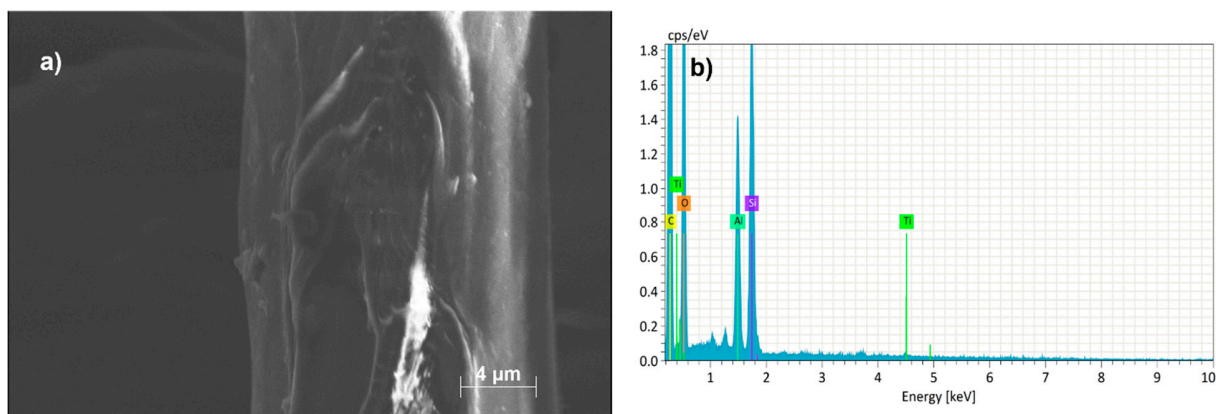

Figure S3: ALD films on commercial textile. (a) SEM image of TiO<sub>2</sub> film (b) EDS spectrum of TiO<sub>2</sub> film.

Table S3: Atomic weight percentages as determined via XPS for TiO<sub>2</sub> coated nonwovens before and after catalysis.

| Name  | Atomic % (Before Catalysis) | Atomic % (After Catalysis) |
|-------|-----------------------------|----------------------------|
| Ti 2p | 10.21                       | 13.44                      |
| C 1s  | 61.73                       | 47.9                       |
| N 1s  | 0.43                        | 1.91                       |
| O 1s  | 27.63                       | 36.75                      |
